# Supplementary material for: Thermostable Lactonases Inhibit Pseudomonas aeruginosa Biofilm: Effect In Vitro and in Drosophila melanogaster Model of Chronic Infection
Source: MDPI journal article supplement (doi:10.3390/ijms242317028), 2023-12-01
Supplement: s1 [file s1]

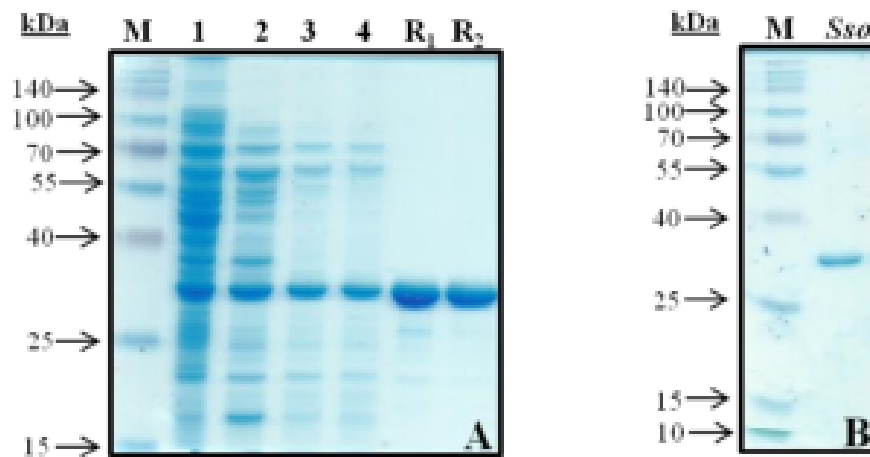

**Figure S1:** 12.5% SDS-PAGE analysis of protein fractions obtained during purification of SacPox (A) and SsoPox (B). M: molecular mass standards; 1: crude extract; 2: soluble fraction after thermoprecipitation at 60 °C; 3: soluble fraction after thermoprecipitation at 70 °C; 4: soluble fraction after thermoprecipitation at 80 °C; R<sub>1</sub>: pooled Gf fractions; R<sub>2</sub>: pure SacPox (5 µg); Sso: pure SsoPox (2.5 µg).

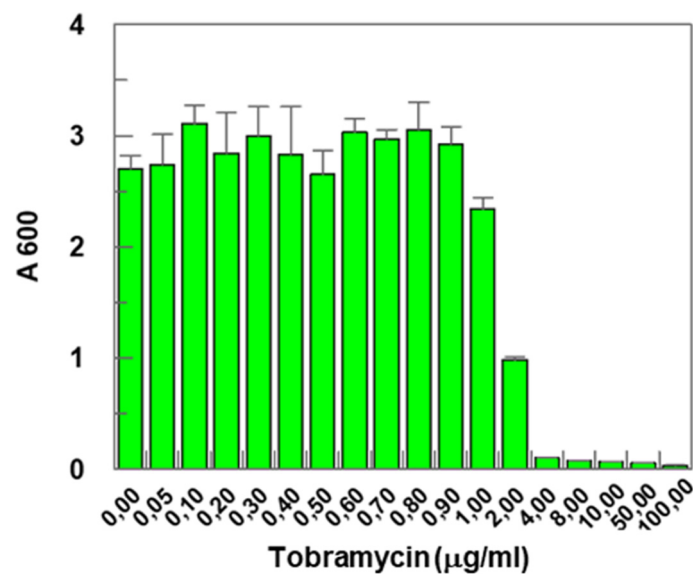

**Figure S2:** Bar graph of PAO1 overnight liquid growth in presence of different concentrations of tobramycin.
